# Supplementary material for: Ubiquitin conjugation to Gag is essential for ESCRT-mediated HIV-1 budding
Source: PubMed Central journal article supplement (PMC3751857; doi:10.1186/1742-4690-10-79), 2013-07-29

### Supplemental figure legends:

**Fig. S1: Effect of DUB-TSG101 in HIV-1 and MoMLV release. (A) DUB-TSG101 interferes with HIV-1 release.** 293T cells were transfected with expression plasmids of HIV-1 (lane 1) and Flag-TSG101, Flag-DUB-TSG101 or Flag-DUB\*-TSG101 expression plasmids (lanes 2, 3, 4, respectively). **(B) DUB-TSG101 had no effect on MoMLV release.** 293T cells were transfected with MoMLV proviral DNA alone (lane 1), with Flag-DUB-TSG101 (lane 2) or Flag-DUB\*-TSG101 (lane 3). **(C) EIAV budding is immune to DUB-TSG101 inhibitory effects.** 293T cells were transfected with EIAV proviral DNA alone (lane 1), with Flag-DUB-TSG101 (lane 2) or Flag-DUB\*-TSG101 (lane 3). **(D) DUB-TSG101 M95A mutant fails to inhibit HIV-1 release:** 293T cells were transfected with expression plasmids of HIV-1 YP- alone (lane 1), or with Flag-TSG101 (lane 2), DUB-TSG101 (lane 3), DUB-TSG101 M95A mutant (lane 4) or the inactive form DUB\*-TSG101 (lane 5). Cells and viruses were collected 24 hours post-transfection and their protein content was analyzed by WB blot using the indicated antibodies. Virus release was quantified from 3 independent experiments and expressed relative to WT virus.

**Fig. S2: DUB-Alix and DUB\*-Alix fusion proteins retain ability to dimerize.** 293T cells were transfected with HA-tagged Alix, DUB-Alix or DUB\*-Alix expression vectors alone (First panel, lanes 1, 5 and 9) or in combination with Flag-Alix (lanes 2, 6 and 10), Flag-V-PRD (lanes 3, 7 and 11) or Flag-Bro1 (lanes 4, 8 and 12). HA-tagged proteins were immunoprecipitated on HA-antibody conjugated beads and captured protein complexes (Second panel) were probed for their ability to interact with Flag-Alix and Alix fragments V-PRD and Bro1. Protein complexes and cell lysates (input fractions) were analyzed by WB blot using the indicated antibodies.

**Fig. S3 DUB-Alix has no detectable effect on HIV-1 production.** 293T cells were transfected with HIV-1 provirus DNA alone (lane 1), or in combination with either the Flag-DUB-Alix (lane 2) or DUB\*-Alix (lane 3). Twenty-four hours later, cells and virus were harvested, viral particles pelleted and their protein content analyzed by WB blot

using the indicated antibodies. Relative virus release efficiencies were calculated from three independent experiments and expressed relative to the WT provirus and shown under panels. Error bars represent standard deviations (SD).

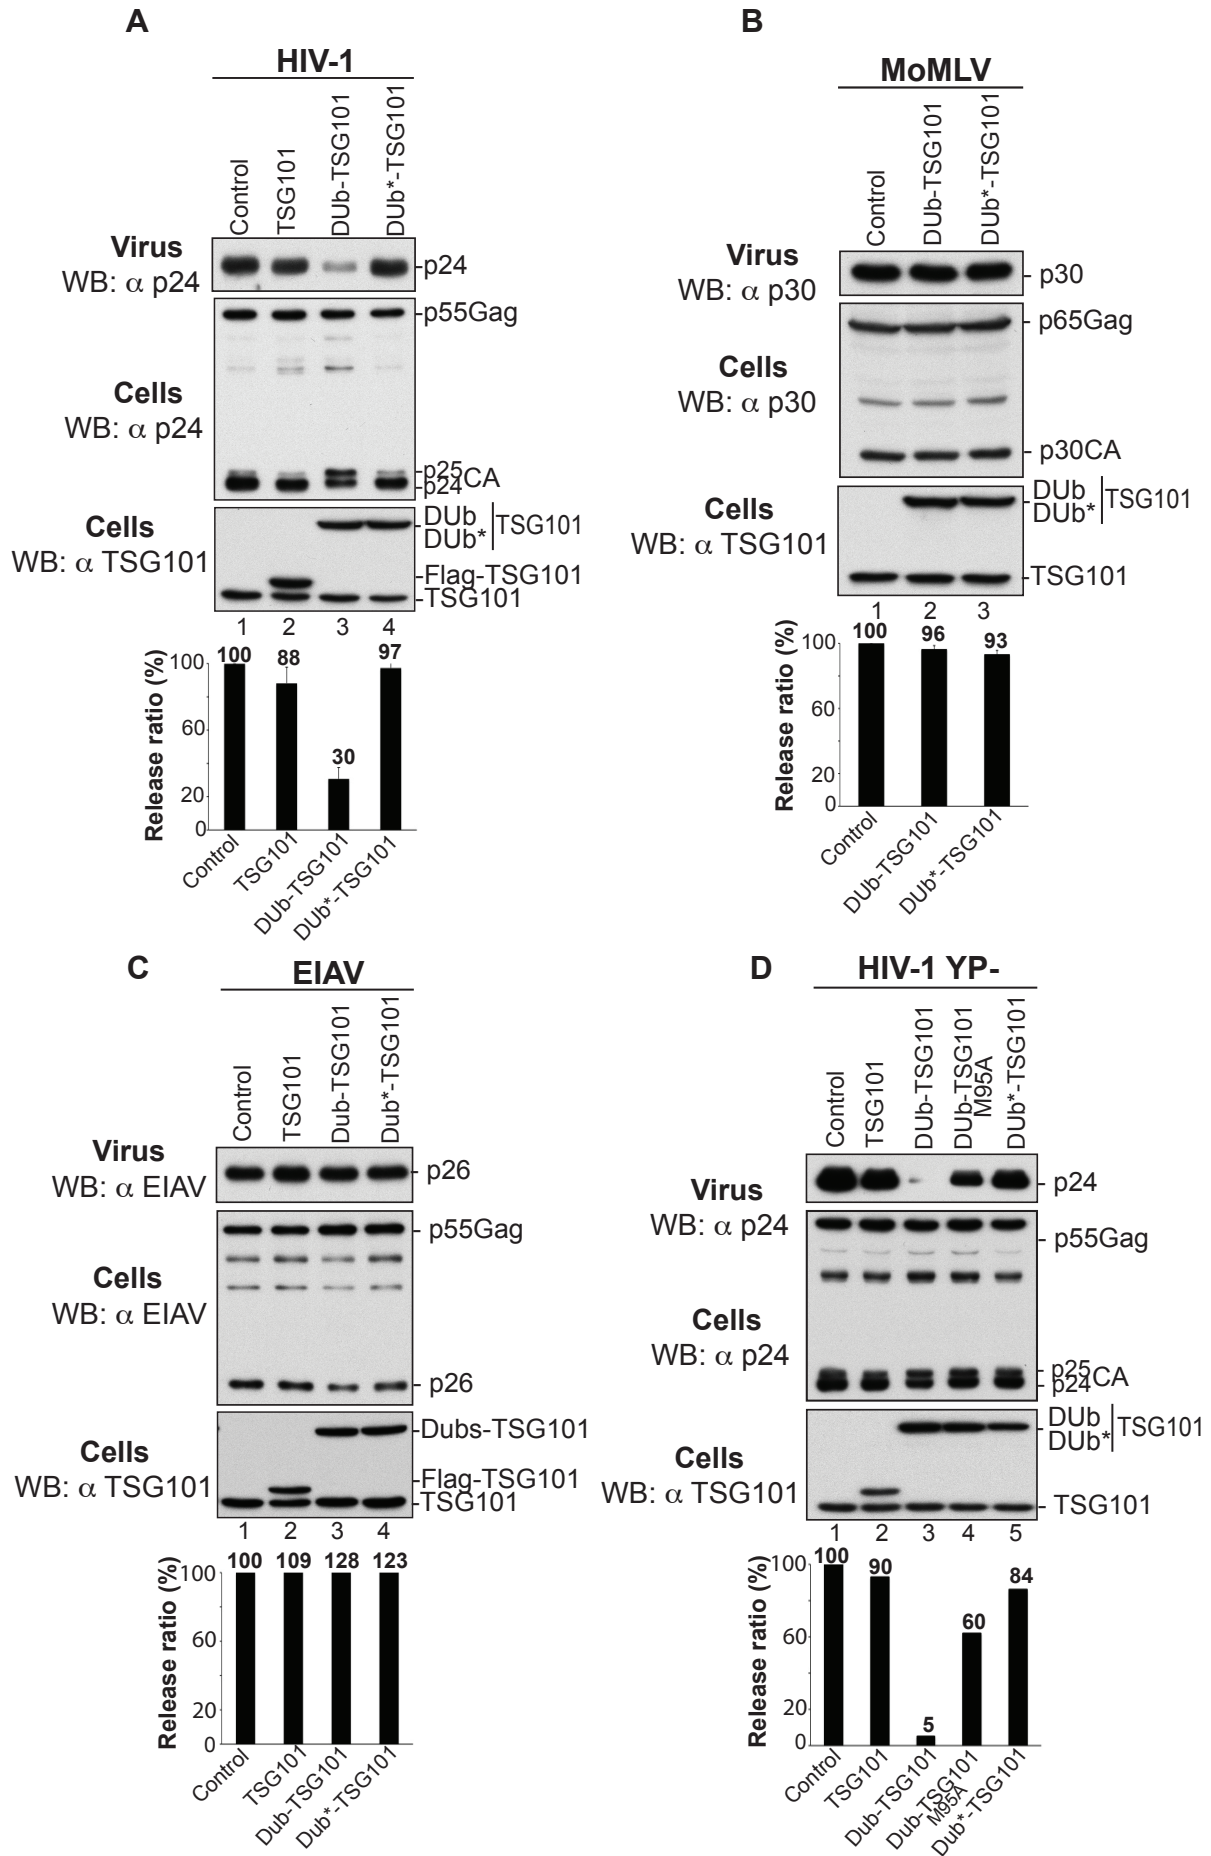

S2

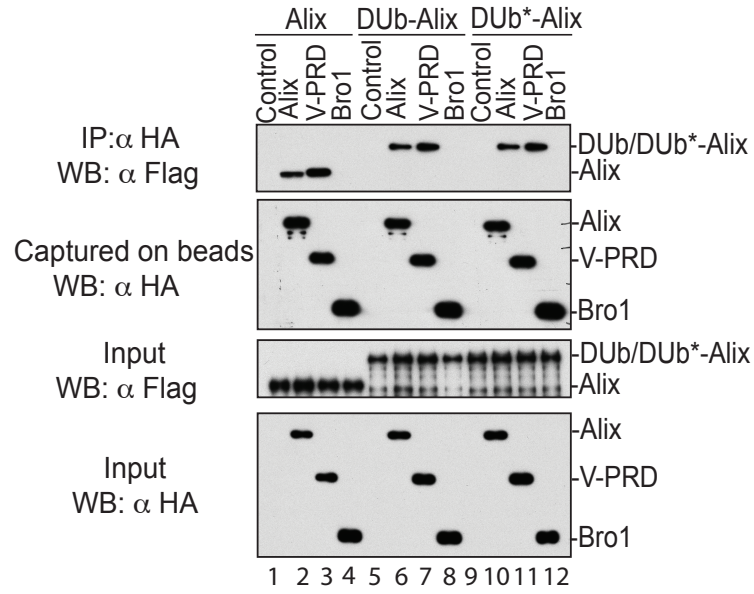

S3

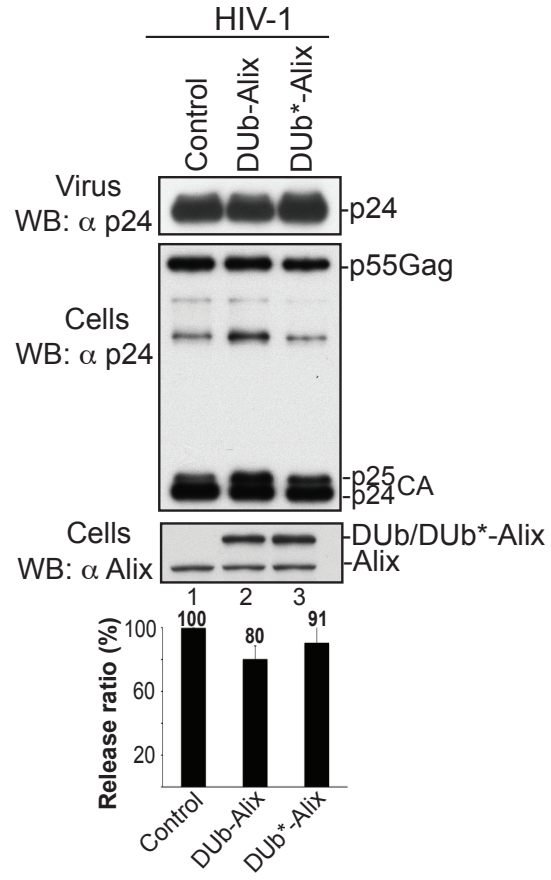

Supplement: 1742-4690-10-79-S1.pdf [file 1742-4690-10-79-S1.pdf]
